# Supplementary material for: Understanding the drivers, scale and impact of abandoned, lost and otherwise discarded fishing gear in small-scale fisheries: an Eastern Caribbean perspective
Source: Frontiers journal article supplement (doi:10.3389/fmars.2023.1139259), 2023-04-25
Supplement: Table_1.DOCX [file Table_1.DOCX]

**Supplementary Material**

**Data Sheet 1**

**Fisher Interview Parameters Analysed in This Study – Traps**

5.1 When/If you lose a trap/pot or parts of it, which one of the following elements are lost? Please refer to manual for the description (drawings 2 to 6) of each element.

| Traps and pots elements | Very frequently | Sometimes | Rarely | Never |
| --- | --- | --- | --- | --- |
| One entire set (with all elements) |  |  |  |  |
| One unit (one trap) |  |  |  |  |
| Buoys |  |  |  |  |
| Net cut-off |  |  |  |  |

5.2 Over a typical year estimate how many individual traps could be lost or approximately kg of fragments?

5.9 When vessel loses traps, what are the main causes of the gear loss? Answer each line by selecting one the four possible responses provided.

| Causes | Always | Sometimes | Never | Don’t Know/Not Relevant |
| --- | --- | --- | --- | --- |
| Net snagged on an obstruction, such as reef, rocky area or shipwreck |  |  |  |  |
| Poor weather conditions |  |  |  |  |
| Damage or towed away by large animals |  |  |  |  |
| Drifted out of area that cannot be accessed by the vessel |  |  |  |  |
| Faulty, old or damaged gear |  |  |  |  |
| Operator error |  |  |  |  |
| Strong currents |  |  |  |  |
| Deep water (e.g. line to buoy too short) |  |  |  |  |
| Gear not properly stored on-board |  |  |  |  |
| Conflict with other gear, e.g. trawls towing away nets |  |  |  |  |
| Vandalism, (stolen or destroyed) |  |  |  |  |
| The surface marking is lost, sunk or malfunctioned |  |  |  |  |
| Gear intentionally discarded overboard |  |  |  |  |
| Equipment failure (i.e hauler or location equipment) |  |  |  |  |
| High traffic of other vessels |  |  |  |  |
| Lack of communications between fishing vessels |  |  |  |  |
| Others |  |  |  |  |

**Fisher Interview Parameters Analysed in This Study – Lines**

5.1 When/If you lose fishing gear with hooks or longlines or parts of it, which one of the following elements are lost?

| Hook and Line elements | Very frequently | Sometimes | Rarely | Never |
| --- | --- | --- | --- | --- |
| One entire set (with all elements) |  |  |  |  |
| One unit (one trap) |  |  |  |  |
| Buoys |  |  |  |  |
| Floats |  |  |  |  |
| Plastic Lures |  |  |  |  |

5.9 When vessel loses hooks or lines, what are the main causes of the gear loss?

| Causes | Always | Sometimes | Never | Don’t Know/Not Relevant |
| --- | --- | --- | --- | --- |
| Net snagged on an obstruction, such as reef, rocky area or shipwreck |  |  |  |  |
| Poor weather conditions |  |  |  |  |
| Damage or towed away by large animals |  |  |  |  |
| Drifted out of area that cannot be accessed by the vessel |  |  |  |  |
| Faulty, old or damaged gear |  |  |  |  |
| Operator error |  |  |  |  |
| Strong currents |  |  |  |  |
| Deep water (e.g. line to buoy too short) |  |  |  |  |
| Gear not properly stored on-board |  |  |  |  |
| Conflict with other gear, e.g. trawls towing away nets |  |  |  |  |
| Vandalism, (stolen or destroyed) |  |  |  |  |
| The surface marking is lost, sunk or malfunctioned |  |  |  |  |
| Gear intentionally discarded overboard |  |  |  |  |
| Equipment failure (i.e hauler or location equipment) |  |  |  |  |
| High traffic of other vessels |  |  |  |  |
| Lack of communications between fishing vessels |  |  |  |  |
| Others |  |  |  |  |
