# Supplementary material for: Understanding the drivers, scale and impact of abandoned, lost and otherwise discarded fishing gear in small-scale fisheries: an Eastern Caribbean perspective
Source: Frontiers journal article supplement (doi:10.3389/fmars.2023.1139259), 2023-04-25
Supplement: Table_2.DOCX [file Table_2.DOCX]

**Supplementary Data Sheet 2**

**Diver Interview Questions**

1. How old are you? _____________________________________________________________
2. How many years have you been a diver? ___________________________________________
3. What is your primary purpose for diving? Recreation Fishing Conservation/Management
4. Have you ever heard of the terms abandoned lost or otherwise discarded fishing gear or derelict fishing gear? Yes No
5. If Yes please explain what you understand by these terms. ______________________________________________________________________________________________________________________________________________________
6. Based on this definition (either provided by interviewee or myself) have you ever encountered what appears to be abandoned lost or otherwise discarded fishing gear while diving?

Yes No

1. If yes, please indicate what types of gear you have encountered:

Fish traps Monofillament nets Multifilament/polypropylene nets

Fishing line FAD components Other

1. For each type of derelict gear encountered please indicate the frequency with which you have encountered them. Always Frequently Sometimes Rarely Never
2. When you have encountered derelict gear have you noticed them impacting habitats (snagged) or wildlife (have you seen fish or other marine life entrapped or entangled in derelict gear?)?
3. Over the past 10 years has the problem of ALDFG been getting better or worst or is it the same?
4. In the next 5 years do you think the problem will getter or worst or will it remain the same.
5. Do you have any thoughts on how the management of ALDFG can be improved in your country?
