# Supplementary material for: Understanding the drivers, scale and impact of abandoned, lost and otherwise discarded fishing gear in small-scale fisheries: an Eastern Caribbean perspective
Source: Frontiers journal article supplement (doi:10.3389/fmars.2023.1139259), 2023-04-25
Supplement: Table_3.DOCX [file Table_3.DOCX]

**Supplementary Data Sheet 3**

**Estimate of Number of Traps Operating per average fishing trip based on size class of vessels**

**For Antigua and Barbuda**

| **Size Class** | **Number of active vessels** | **Average # of[[1]](#footnote-1) traps** | **Total traps** |
| --- | --- | --- | --- |
| < 21 feet | 25 | 36.5 | 912.5 |
| 21-30 feet | 57 | 65,00 | 3705 |
| 31-40 feet | 26 | 86.2 | 2241,2 |
| 41-50 feet | 6 | 80,00 | 480 |
| >50 feet | 2 | 129,00 | 258 |
| Total | 116,00 |  | 6684,2 |

1. Averages were based on estimates in (Horsford, 2017) [↑](#footnote-ref-1)
