# Supplementary material for: Understanding the drivers, scale and impact of abandoned, lost and otherwise discarded fishing gear in small-scale fisheries: an Eastern Caribbean perspective
Source: Frontiers journal article supplement (doi:10.3389/fmars.2023.1139259), 2023-04-25
Supplement: Table_4.DOCX [file Table_4.DOCX]

**Supplementary Figures**

**Drivers of Line and Trap loss – Combined results**

When considering a comparative Assessment of the major drivers of fish trap in Antigua and Barbuda versus Dominica, it is revealed that in both jurisdictions severe weather was the most significant cause of trap loss (Supplementary Figure 1). In both instances more than 90% of fishers identified that this occurred either always or sometimes. Snagging of gear and strong currents were also shown to be major drives in each case. Theft/vandalism of traps was more of an issue in Antigua and Barbuda versus Dominica, while drifting of gear and vessel traffic was more prevalent in Dominica. Improper storage of gear was not a major issue in either country.

Supplementary Figure 1: Comparative View of Major Drivers of Trap Loss in Antigua and Barbuda and Dominica. (Percentage of Fishers that Indicated the Identified Drivers Led to Trap Loss Either “Always” or “Sometimes”).

With regard to the line fisheries, the towing of lines by large animals emerged as a major driver in both countries (S. Figure 2). Strong currents and poor weather were more prevalently cited as drivers of line loss in Antigua and Barbuda while gear conflict was more of an issue in Dominica.

Supplementary Figure 2: Comparative View of Major Drivers of Line Loss in Antigua and Barbuda and Dominica. (Percentage of Fishers that Indicated the Identified Drivers Led to Line Loss Either “Always” or “Sometimes

**Diver Encounters of ALDFG – Combined Results**

The results from diver interviews from both countries was combined and yielded the following results. Traps emerged as the most frequently encountered forms of ALDFG (n=12) followed by polypropylene nets and line fragments (n=11). 10 out of the 14 interviewees indicated that they encountered ropes during divers. See S. Figure 3 below.

Supplementary Figure : Categories and rates of encounter of various forms of ALDFG by divers in Antigua and Barbuda and Dominica

Almost 70% of those who encountered traps indicated they did so either always, frequently or sometimes. Only 31% indicated fish traps were rarely observed (S. Figure 4).

Supplementary Figure : Encounter rates for derelict traps reported by divers in Antigua and Barbuda and Dominica.

More than 80% of those who indicated they encountered polypropylene nets did so either frequently or sometimes (S. Figure 5).

Supplementary Figure : Encounter rates for derelict polypropylene net fragments reported by divers in Antigua and Barbuda and Dominica

Similar to the polypropylene net results only 18% of those who encountered fishing line indicated they did so rarely, all others indicated they encountered lines either always, frequently or sometimes (S. Figure 6).

Supplementary Figure : Encounter rates of line fragments as reported by divers in Antigua and Barbuda and Dominica

When both sets of data were combined more than half of the respondents indicated they encountered ropes while diving. 70% of those did so either frequently or sometimes (S. Figure 7).

Supplementary Figure : Encounter rates of derelict rope as reported by divers in Antigua and Barbuda and Dominica.
